# Supplementary material for: Regulation of mouse stomach development and Barx1 expression by specific microRNAs
Source: Oxford University Press journal article supplement (doi:10.1242/dev.056317), 2011-02-10
Supplement: dev056317tables2.pdf [file dev056317tables2.pdf]

**Table S2. Suitable complementarity of sequences in the mouse *Barx1* 3'-UTR to those of known miRNAs**

| miRNA      | Score   | Energy | Start | End | Alignment                                            |
|------------|---------|--------|-------|-----|------------------------------------------------------|
| miR-135    | 18.438  | -32.16 | 362   | 385 | GCGGUG--CCgaGguuAGGGAUau<br>CGCCACCGGGtgCaggTCCCTATg |
| miR-203    | 18.0042 | -13.1  | 68    | 89  | gAucaccAcGAUUuGUAAGUg<br>gTttgctTtCTAAtCATTTCat      |
| miR-689    | 17.5504 | -31.51 | 20    | 39  | cCuGgGgCgGCUCGCCCCUGc<br>tGgCgCgGtCG-GCGGGACc        |
| miR-764-3p | 17.4619 | -23.62 | 421   | 441 | uGUCaACggUGAuACCGGAGGa<br>tCAGcTGatAC-cTGGCCTCCc     |
| miR-7a     | 16.7304 | -17.59 | 203   | 225 | uguuGuUUuaguGAuCAGAAGGu<br>tggcCgAAgcttCTgGTCTTtCt   |
| miR-293    | 16.5942 | -22.03 | 228   | 249 | uguGAuGuuUgAgACGCCGuGA<br>gacCTcCgcAgTgTGGGCGcCT     |
| miR-764-3p | 16.3773 | -16.93 | 280   | 301 | UGUcAAcggGuaCCGGAGGa<br>ACAcTttatCcccGGCCTCCa        |
| miR-615-5p | 16.1604 | -32.4  | 21    | 42  | CuagGCucGugGCCCCUGGGg<br>GgcgCGgtCggCGGGGACCCag      |
| miR-328    | 15.7265 | -22.73 | 100   | 121 | UgcCuuCccgUcucUCCCCGUC<br>AatGcgGacaAttaAGGGCCAG     |
| miR-689    | 15.2612 | -25.49 | 340   | 360 | ccuggGGCGgcucgCCCCUGc<br>tacttCCGcgccttGGGGACc       |

The *Barx1* 3'-UTR reference sequence is aligned in red. Sequence position is numbered according to *Barx1* reference clone ENSMUST0000021813 (MGI: 103124). Complementarity appropriate for miRNA activity of each candidate is delineated in capital letters. Binding energy and miRNA score are derived from EMBL-EBI MicroCosm Target.

*Barx1* 3'-UTR sequence.

1 GCGTCGCCGAGGATGCGGCTGGCGCGGTGCGGGGACCCAGGAGCTGGCCCTTCCGCGT 60  
61 CCATGCCGTTTGCTTTCTAATCATTTCACTACTTTGAATGCAGACAATTAAGGGCCA 120  
121 GACAAGGAAGGACACAGGCCCGGAAGCCAATCCAGGTGTCAGCGAGTTCTGTCCCCAG 180  
181 TCTGGGAGACTTGTGTCCAGCGTGGCCGAAGCTTCTGGTCTTTCTCGGACCTCCGCAGTG 240  
241 TGGGGCGCTCCACGCTATTACGCCCGCTCCTTGCCACACTTTTATCCCCGGCCTCC 300  
301 AGCCGGCCTTCTGGGCCCGGACACCGGAGGCACACACTTACTTCCGCGCCTTGGGGACC 360  
361 CCGCCACCGGTGCAGTCCCTATGGCCCTGCCCTGCAGAGCAGATCGTCTCTAGCAGA 420  
421 TCAGCTGATACCTGGCCTCCCCATGTCGCTGAGGCTTCT 459
